# Supplementary material for: Lightweight and flexible conducting polymer sponges and hydrogels for electromagnetic interference shielding
Source: Royal Society of Chemistry journal article supplement (doi:10.1039/d1tc04008a), 2021-01-01
Supplement: d1tc04008a1.pdf [file d1tc04008a1.pdf]

## Lightweight and flexible conducting polymer sponges and hydrogels for electromagnetic interference shielding

Biporjoy Sarkar,<sup>a</sup> Xinda Li,<sup>a</sup> Eric Quenneville,<sup>b</sup> Louis-Philippe Carignan,<sup>c</sup> Ke Wu<sup>c</sup> and Fabio Cicoira<sup>a,\*</sup>

<sup>a</sup> Department of Chemical Engineering, Polytechnique Montreal, Canada, H3T 1J4

<sup>b</sup> Biomomentum, Laval, Canada, H7L 5C1

<sup>c</sup> Department of Electrical Engineering, Polytechnique Montreal, Canada, H3T 1J4

\*Corresponding authors: [biporjoy.sarkar@polymtl.ca](mailto:biporjoy.sarkar@polymtl.ca) and [fabio.cicoira@polymtl.ca](mailto:fabio.cicoira@polymtl.ca)

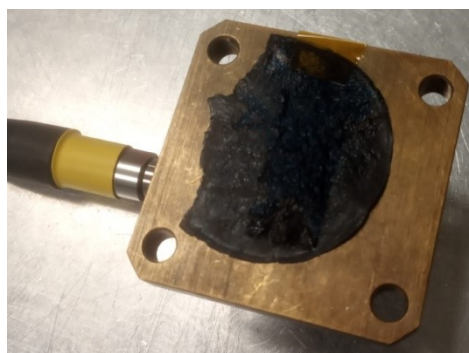

**Fig. S1** The rectangular opening of the WR 90 waveguide (22.86 mm × 10.16 mm) completely covered with PEDOT:PSS hydrogel film.

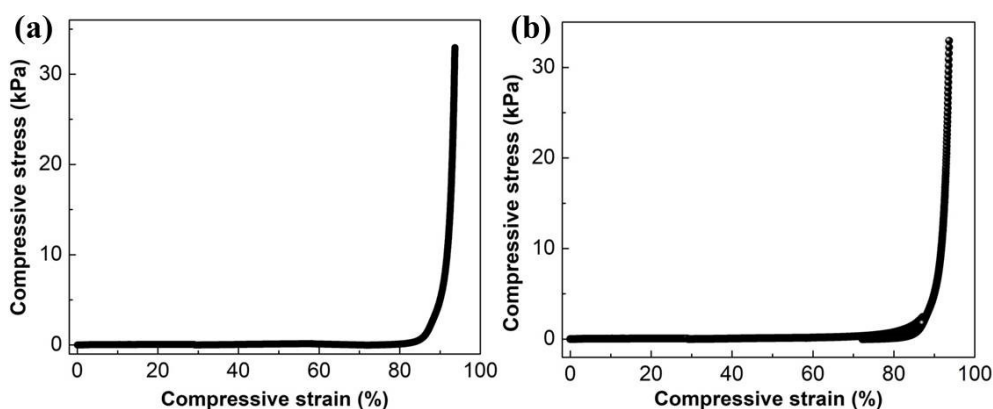

**Fig. S2** (a-b) Compressive stress-strain curve of PEDOT:PSS sponge (sample 2 and sample 3).

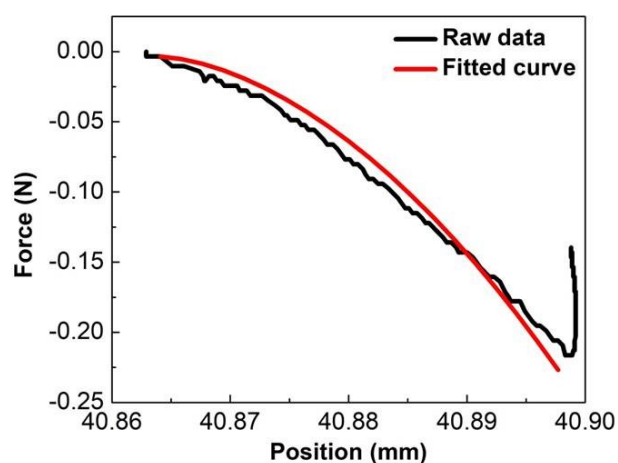

**Fig. S3** Force versus position plot (indentation test). 0.5 mm diameter spherical indenter attached to a load cell was indented on the hydrogel film to estimate the Young's modulus. Black and red solid line represent raw data and fitted curve, respectively.

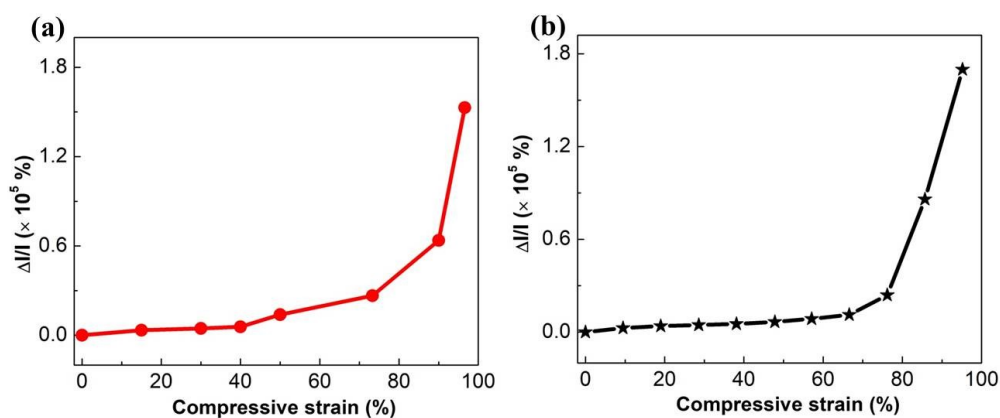

**Fig. S4** (a-b) Variation of normalized current as a function of strain under unconfined compression for PEDOT:PSS sponge (sample 2 and sample 3).

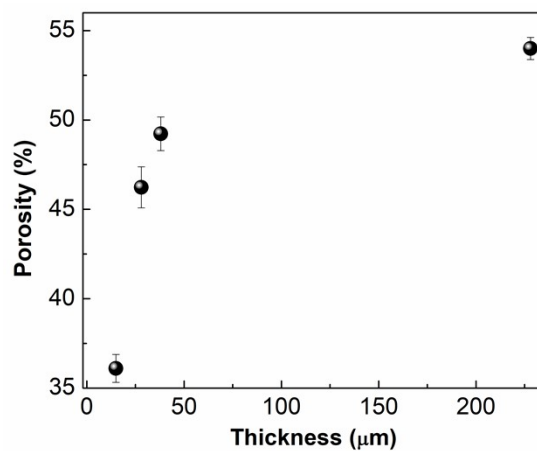

**Fig. S5:** Variation of porosity as a function of PEDOT:PSS hydrogel film thickness.

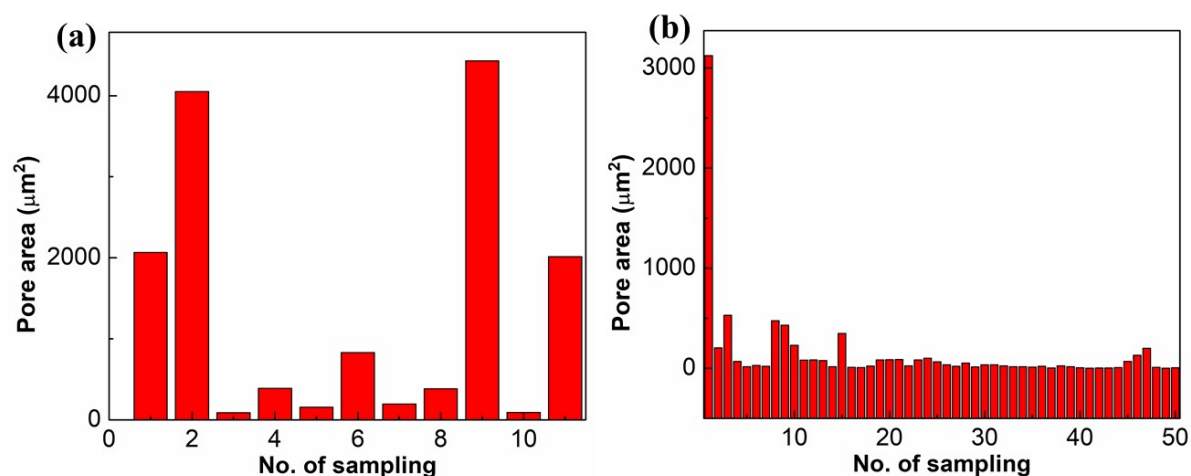

**Fig. S6:** (a-b) Bar plot of pore area as a function of number of sampling for uncompressed and compressed PEDOT:PSS sponge.

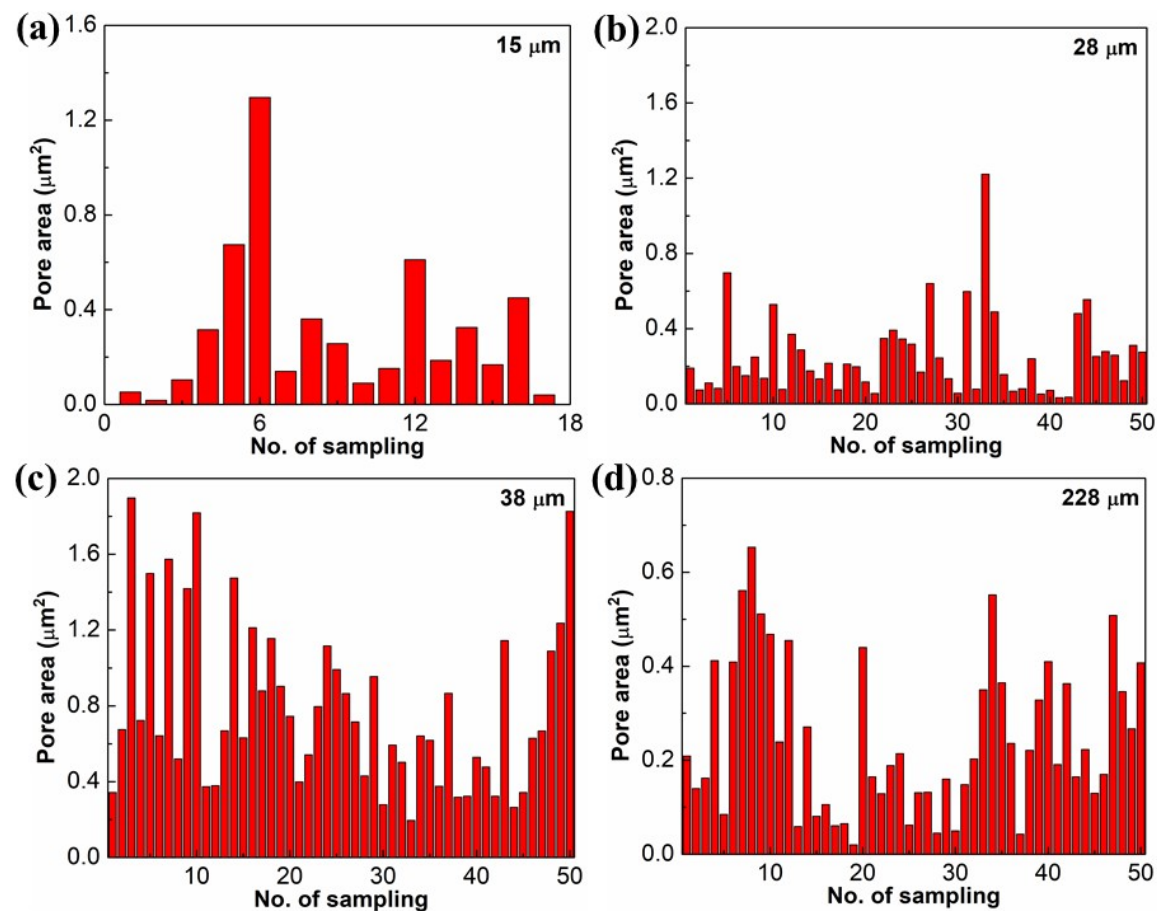

**Fig. S7:** (a-d) Bar plot of pore area as a function of number of sampling for 15  $\mu\text{m}$ , 28  $\mu\text{m}$ , 38  $\mu\text{m}$  and 228  $\mu\text{m}$  thick PEDOT:PSS hydrogel film.

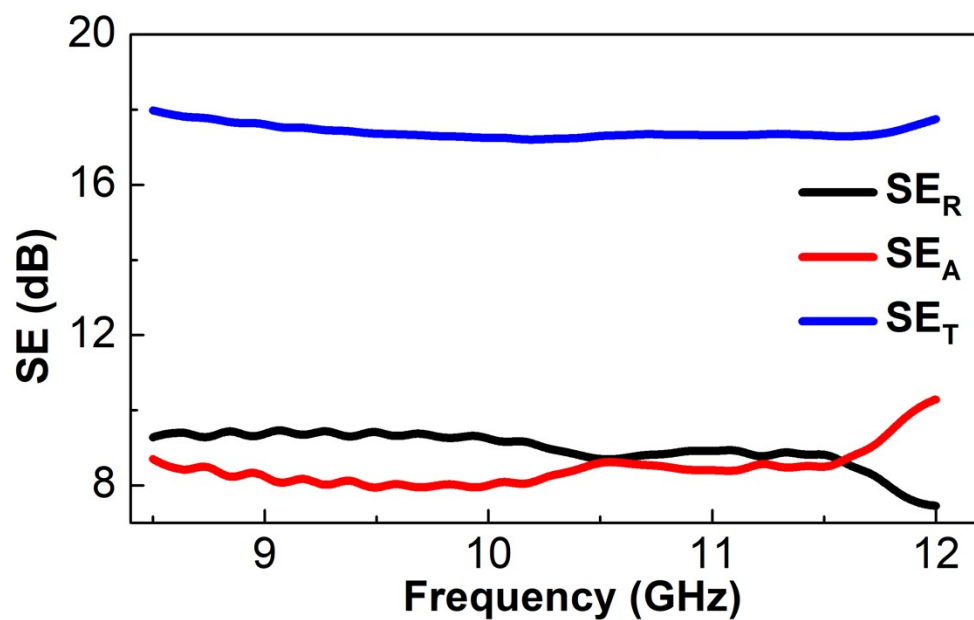

**Fig. S8:** Variation of EMI SE as a function of frequency for a pure PEDOT:PSS film.

| EMI shielding parameters (dB) | PEDOT:PSS sponges |            | PEDOT:PSS hydrogel films |            |            |             | Pristine PEDOT:PSS film (40 $\mu$ m) |
|-------------------------------|-------------------|------------|--------------------------|------------|------------|-------------|--------------------------------------|
|                               | Uncompressed      | Compressed | 15 $\mu$ m               | 28 $\mu$ m | 38 $\mu$ m | 228 $\mu$ m |                                      |
| $SE_R$                        | 6.81              | 10.77      | 18.16                    | 33.23      | 33.76      | 27.28       | 9.38                                 |
| $SE_A$                        | 6.67              | 12.11      | 24.54                    | 23.05      | 30.54      | 68.47       | 8.23                                 |
| $SE_T$                        | 13.48             | 22.92      | 42.70                    | 56.30      | 64.30      | 95.83       | 17.60                                |

**Table S1:** Comparison table of EMI shielding properties of PEDOT:PSS sponges, hydrogel films and a pristine PEDOT:PSS film. All the SE values are estimated at a representative frequency value of 9 GHz.

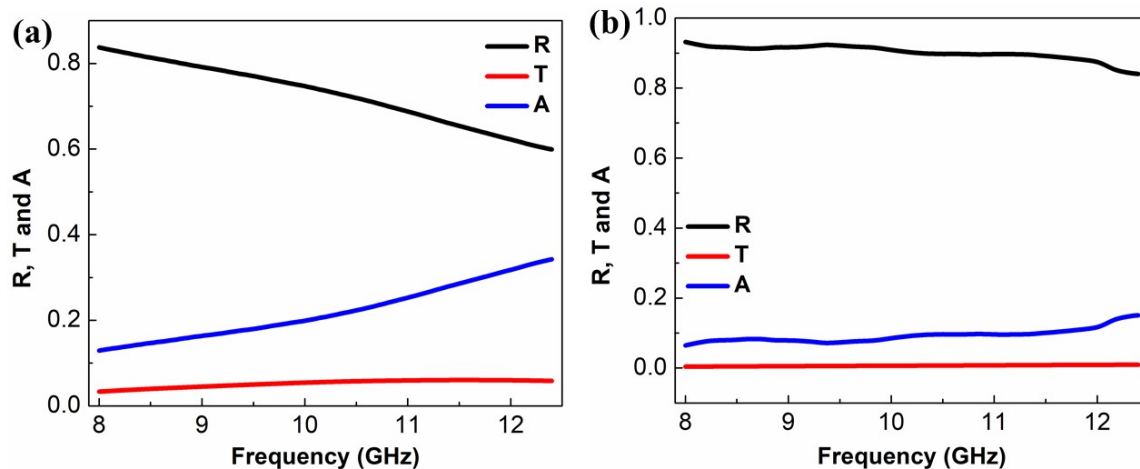

**Fig. S9:** (a-b) Variation of R, T and A as a function of frequency for uncompressed and compressed PEDOT:PSS sponges.

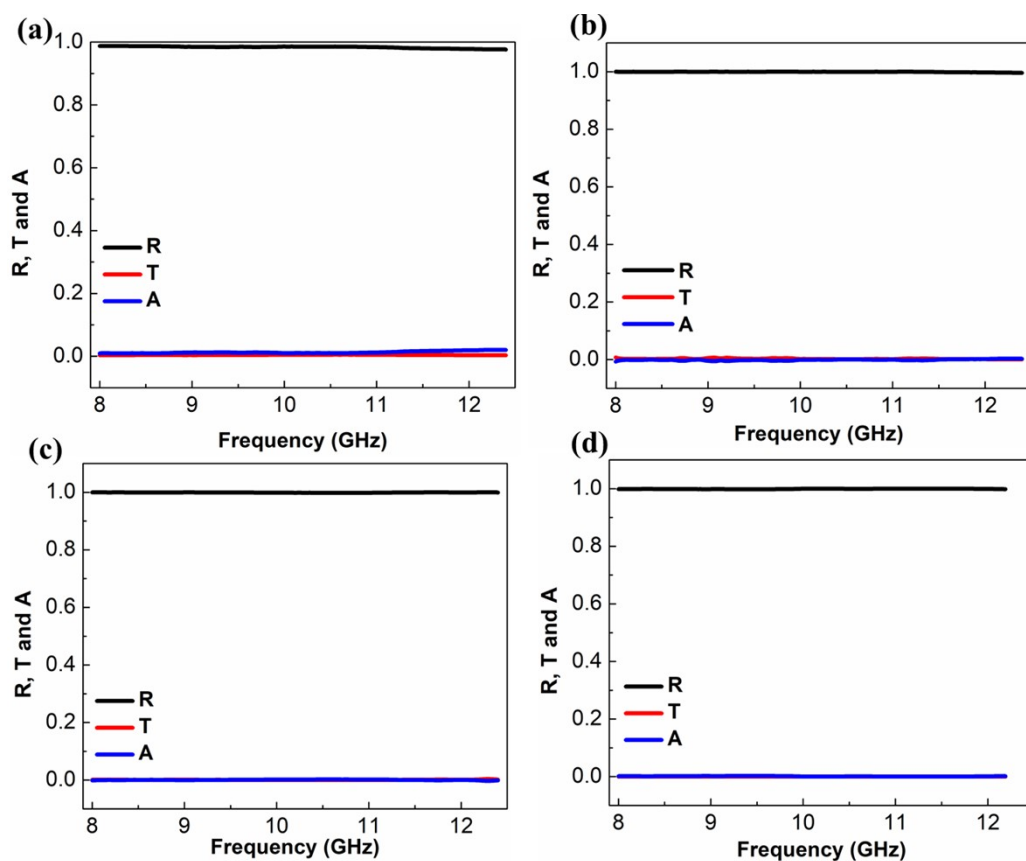

**Fig. S10:** (a-d) Variation of R, T and A as a function of frequency for 15 μm, 28 μm, 38 μm and 228 μm thick PEDOT:PSS hydrogel film.

| Sponges      | Porosity | SE <sub>R</sub> | SE <sub>A</sub> | SE <sub>T</sub> |
|--------------|----------|-----------------|-----------------|-----------------|
| Uncompressed | 96±1.28  | 6.81            | 6.67            | 13.48           |
| Compressed   | 48.6±1.1 | 10.77           | 12.11           | 22.92           |

**Table S2:** Values of porosity and SE for both uncompressed and compressed PEDOT:PSS sponge. Note, SE values are taken at a representative frequency value of 9 GHz.

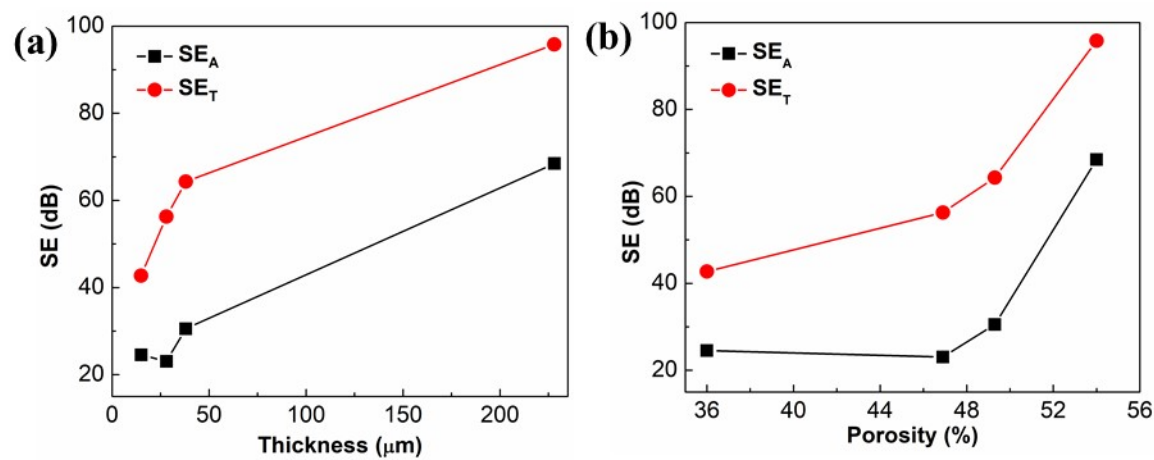

**Fig. S11:** (a-b) Variation of SE<sub>A</sub> and SE<sub>T</sub> as a function of thickness and porosity for PEDOT:PSS hydrogel films. Note, SE values are taken at a representative frequency value of 9 GHz.
